# Supplementary material for: Synergistic tuning of carrier and phonon scattering for high performance of n-type Bi2Te2.5Se0.5 thermoelectric material
Source: Royal Society of Chemistry journal article supplement (doi:10.1039/c5ta06107e), 2015-01-01
Supplement: c5ta06107e1.pdf [file c5ta06107e1.pdf]

Electronic Supplementary Information

**Synergistic tuning of carrier and phonon scattering for high performance of n-type  $\text{Bi}_2\text{Te}_{2.5}\text{Se}_{0.5}$  thermoelectric material**

Ye Xiao, Junyou Yang\* Qinghui Jiang\*, Liangwei Fu, Yubo Luo, Dan Zhang, Zhiwei Zhou

State Key Laboratory of Materials Processing and Die & Mould Technology, Huazhong University of Science and Technology, Wuhan 430074, P. R China

\* To whom correspondence should be addressed. Email: [jyyang@mail.hust.edu.cn](mailto:jyyang@mail.hust.edu.cn)

1. The lattice parameters of the samples with different content of  $\text{MnTe}_2$ .

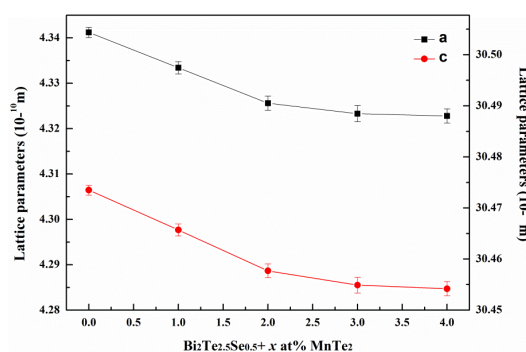

Figure S1. Lattice parameters of  $\text{Bi}_2\text{Te}_{2.5}\text{Se}_{0.5} + x \text{ at.}\% \text{ MnTe}_2$

2. Rietveld refinements.

The XRD patterns of  $x=3.0$  and  $x=4.0$  samples have been refined by the GSAS with EXPGUI interface<sup>[1,2]</sup>. The refined composition for  $x=3.0$  and  $x=4.0$  are

$\text{Bi}_{1.864(2)}\text{Te}_{2.531(1)}\text{Se}_{0.468(9)}\text{Mn}_{0.135(8)}$  and  $\text{Bi}_{1.863(6)}\text{Te}_{2.530(8)}\text{Se}_{0.469(2)}\text{Mn}_{0.136(4)}$ .

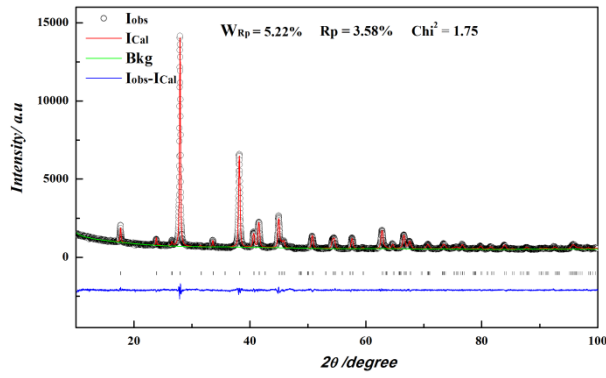

Figure S2. Rietveld refinements for  $x=3.0$  sample.

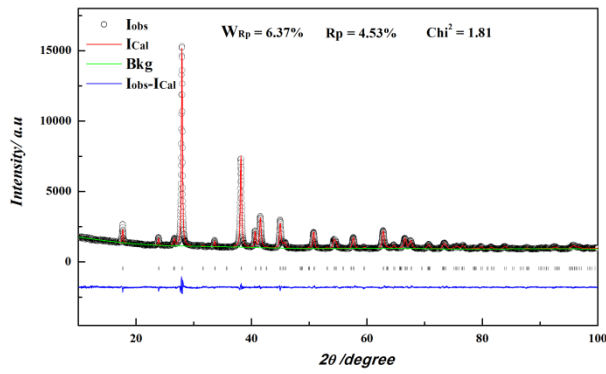

Figure S3. Rietveld refinements for  $x=4.0$  sample.

3. Estimation for the band gap by Goldsmid-Sharp method<sup>[3]</sup>

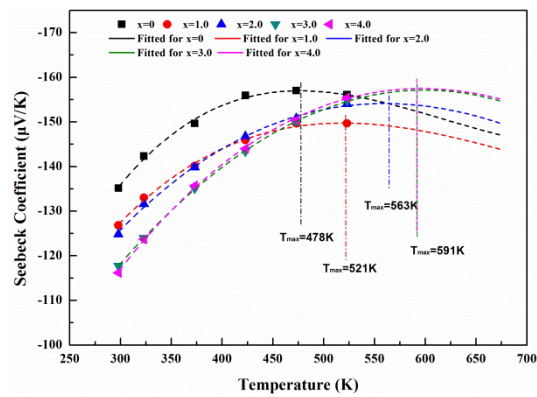

Figure S4. Estimation for the band gap by Goldsmid-Sharp method

4. Power factors of the samples with different content of  $MnTe_2$ .

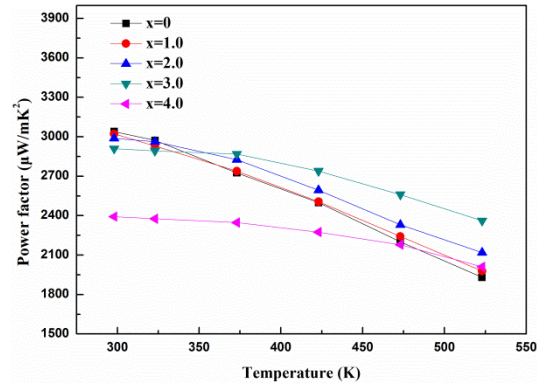

Figure S5. The power factor for  $\text{Bi}_2\text{Te}_{2.5}\text{Se}_{0.5} + x$  at%  $\text{MnTe}_2$

## References

- [1] A.C. Larson and R.B. Von Dreele, General Structure Analysis System (GSAS), Los Alamos National Laboratory Report LAUR 86-748, 2004.
- [2] Brian H. Toby, J. Appl. Cryst. 34, 210-213, 2001.
- [3] H. J. Goldsmid and J. W. Sharp, J Electron Mater., 1999,28,869.
